# Supplementary material for: Quantum dot decorated aligned carbon nanotube bundles for a performance enhanced photoswitch
Source: Royal Society of Chemistry journal article supplement (doi:10.1039/c5nr07494k), 2015-12-10
Supplement: c5nr07494k1.pdf [file c5nr07494k1.pdf]

## Electronic Supplementary Information (ESI)

### **Quantum Dot Decorated Aligned Carbon Nanotube Bundles for a Performance Enhanced Photoswitch**

*Sivaramapanicker Sreejith,<sup>a,§</sup> Reinack Hansen,<sup>b,§</sup> Hrishikesh Joshi,<sup>a</sup> R. Govindan Kutty,<sup>c</sup>  
Zheng Liu,<sup>c</sup> Lianxi Zheng,<sup>d</sup> Jinglei Yang<sup>b,\*</sup> and Yanli Zhao<sup>a,c,\*</sup>*

<sup>a</sup>Division of Chemistry and Biological Chemistry, School of Physical and Mathematical Sciences, Nanyang Technological University, 21 Nanyang Link, 637371, Singapore. Email: zhaoyanli@ntu.edu.sg

<sup>b</sup>School of Mechanical and Aerospace Engineering, Nanyang Technological University, 639798, Singapore. Email: mjlyang@ntu.edu.sg

<sup>c</sup>School of Materials Science and Engineering, Nanyang Technological University, 50 Nanyang Avenue, 639798, Singapore

<sup>d</sup>Department of Mechanical Engineering, Khalifa University, Abudhabi, 127788, United Arab Emirates

1. HRTEM images of CdSe QDs
2. Absorption spectrum analysis
3. EDS spectrum of CdSe-MWCNT@PANI
4. Raman spectrum to characterize (A) MWCNTs and (B) CdSe
5. Contact angle plots for (A) MWCNTs and (B) MWCNT@PANI
6. Computation of electrical parameters for CdSe-MWCNT@PANI
7. Charge transfer mechanism for (A) CdSe, (B) CdSe-MWCNT and (C) CdSe-MWCNT@PANI.

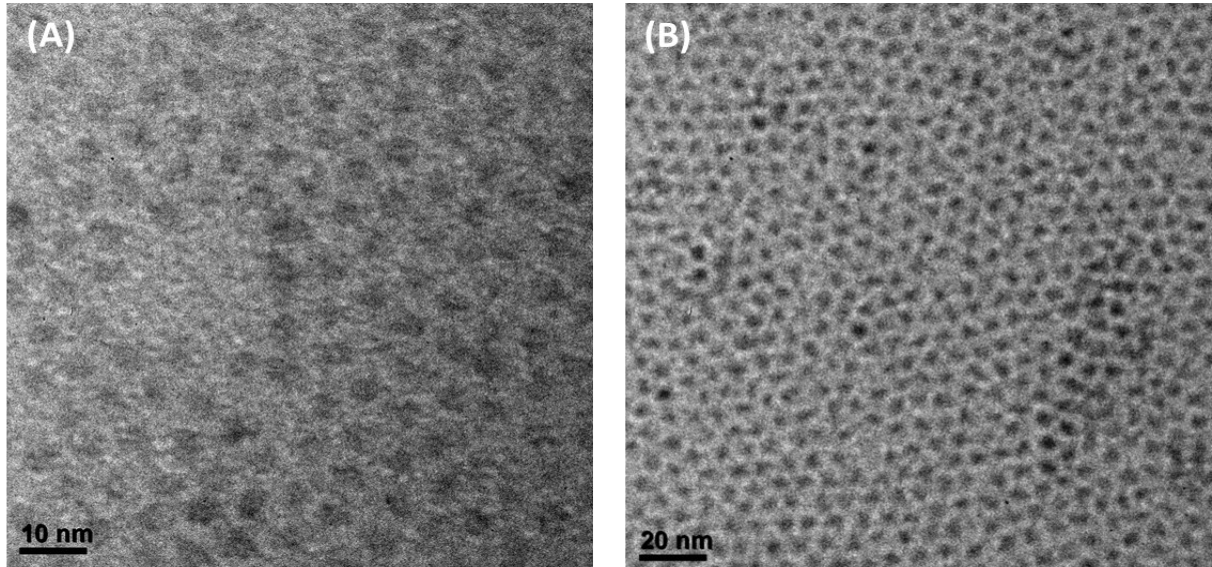

**Fig. S1.** (A,B) High-resolution TEM images of CdSe QDs indicating the size and morphology.

### Absorption spectrum analysis

The plot of  $(Ah\nu)^2$  vs  $h\nu$  was obtained from absorption spectrum, where A represents the absorbance intensity and  $\nu$  represents the wavenumber corresponding to the wavelength. The bulk energy band gap of CdSe is the X-intercept of the linear fit of the data points between the initiation point of the steep rise and the global maximum. The particle size distribution was computed from a theory relating the absorbance intensity and size of particle<sup>[22]</sup> (formula is given below). This formula is valid when particles are spherical.

$$n(r) = (\text{const} \times (dA/dr)) / (\text{volume of sphere})$$

where  $r$  is radius,  $n(r)$  is the frequency of particle size, and  $dA/dr$  is the slope of absorption spectrum. The size relation of CdSe with wavelength was obtained from literature.<sup>[7]</sup> The plot of  $n(r)$  vs  $r$  gives the particle size distribution.

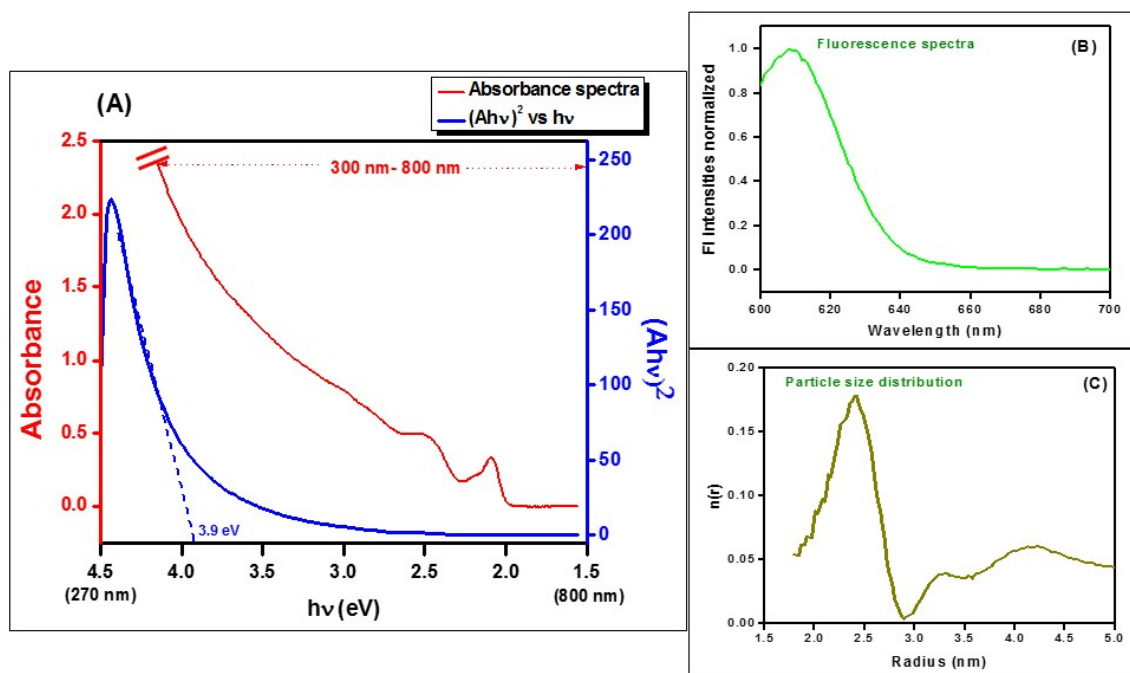

**Fig. S2.** (A) Absorption spectrum of CdSe QDs (red) and  $(Ah\nu)^2$  vs  $h\nu$  plot (blue) to determine the bulk energy gap ( $E_g$ ) for CdSe (blue dotted line). (B) Fluorescence spectrum of CdSe QDs at excitation ( $\lambda_{ex}$ ) wavelength of 514 nm. (C) Particle size distribution plot for CdSe derived from absorption spectrum.

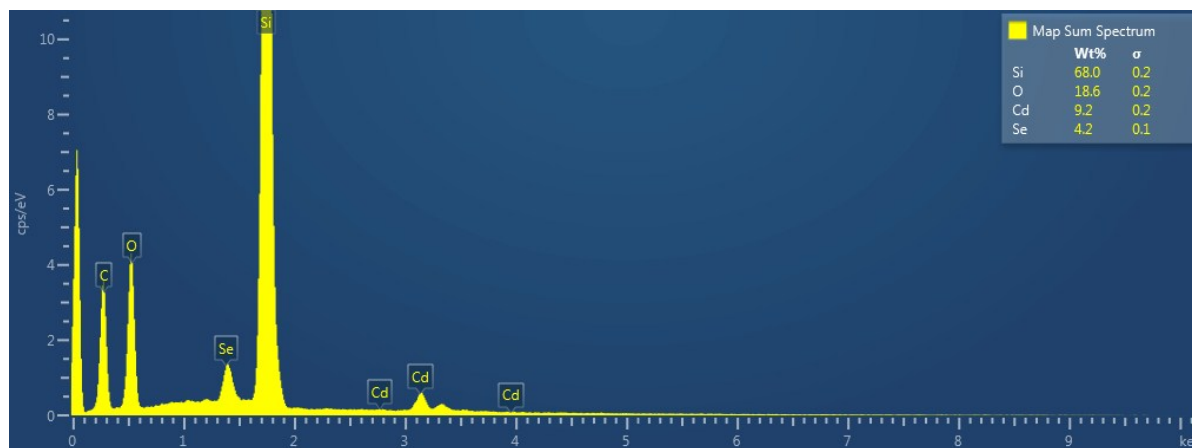

**Fig. S3.** EDS spectrum of CdSe-MWCNT@PANI indicating the presence of various elements in the device such as carbon, selenium, cadmium, and oxygen. Silicon is the base of the device.

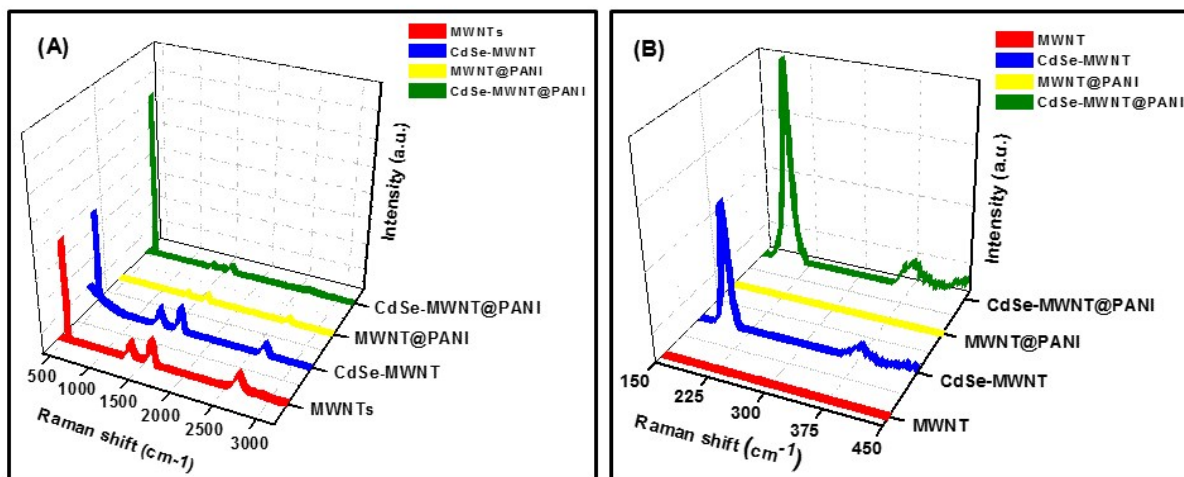

**Fig. S4.** Raman spectra of (A) MWCNTs, CdSe-MWCNT, MWCNT@PANI and CdSe-MWCNT@PANI in the range 500-3200 cm<sup>-1</sup> excited at 633 nm, and (B) MWCNTs, CdSe-MWCNT, MWCNT@PANI and CdSe-MWCNT@PANI in the range of 100-450 cm<sup>-1</sup> excited at 488 nm.

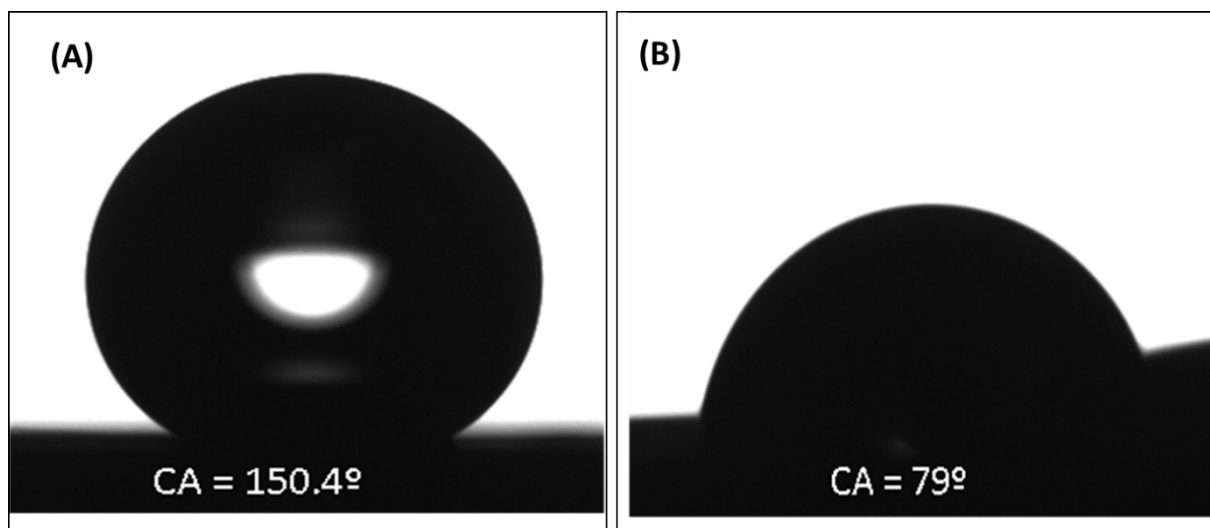

**Fig. S5.** CCD photographs showing the contact angle measurements of a water drop resting on (A) MWCNTs and (B) MWCNT@PANI.

#### Electrical parameters of CdSe-MWCNT@PANI

The short circuit current density ( $J_{sc}$ ) of the device in dark and illuminated conditions was the Y-intercept value of the  $J$ - $V$  curves (Fig. 3B and 3C respectively). The open circuit voltages ( $V_{oc}$ ) in these conditions were the X-intercept of the same graphs. The power conversion efficiency was determined by the formula<sup>[31]</sup>  $(FF \times V_{oc} \times I_{sc}) / P_{in}$  to be 5.41%. The fill factor was determined as the ratio of the area  $J$ - $V$  curve in illuminated conditions to the area of the curve obtained from an ideal photovoltaic cell. The shunt resistance was computed from the slope of the  $I$ - $V$  curve (Fig. 3A) in the low reverse bias region.<sup>[37]</sup>

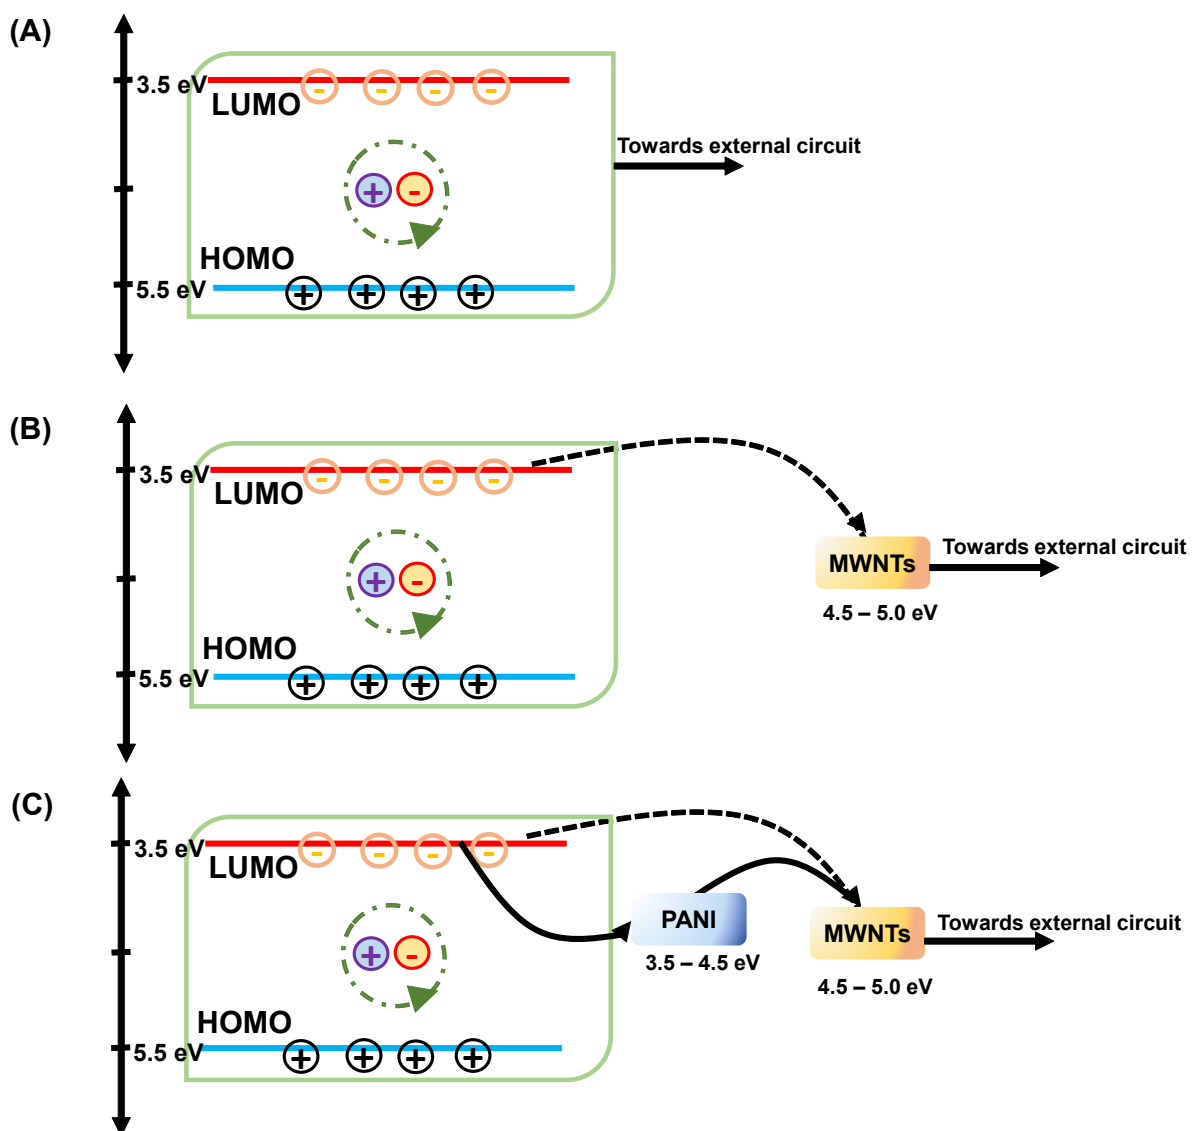

**Fig. S6.** Charge transfer mechanism occurred within (A) CdSe QDs, (B) photoactive cell containing CdSe and MWCNTs, and (C) photoactive cell based on CdSe-MWCNT@PANI (present device).
